# Untargeted saliva metabolomics reveals COVID-19 severity

## Running head: Saliva Metabolomics for SARS-COV-2 Prognosis

Cecile F. Frampas<sup>1</sup>, Katie Longman<sup>1</sup>, Matt P. Spick<sup>1</sup>, Holly M. Lewis<sup>1</sup>, Catia D. S. Costa<sup>2</sup>, Alex Stewart<sup>3</sup>, Deborah Dunn-Walters<sup>3</sup>, Danni Greener<sup>4</sup>, George E. Evetts<sup>4</sup>, Debra Skene<sup>3</sup>, Drupad Trivedi<sup>5</sup>, Andrew R. Pitt<sup>5</sup>, Katherine Hollywood<sup>5</sup>, Perdita Barran<sup>5</sup> and Melanie J. Bailey<sup>1,2</sup>

<sup>1</sup> Faculty of Engineering and Physical Sciences, University of Surrey, Guildford, GU2 7XH, UK

<sup>2</sup> Surrey Ion Beam Centre, University of Surrey, Guildford, GU2 7XH, UK

<sup>3</sup> Faculty of Health and Medical Sciences, University of Surrey, Guildford, GU2 7XH, UK

<sup>4</sup> Frimley Park Hospital, Frimley Health NHS Trust, GU16 7UJ, UK

<sup>5</sup> Manchester Institute of Biotechnology, University of Manchester, M1 7DN, United Kingdom

**Corresponding Author:** Dr Melanie Bailey, tel +44 (0)1483 682593, [m.bailey@surrey.ac.uk](mailto:m.bailey@surrey.ac.uk), Faculty of Engineering and Physical Sciences, University of Surrey, Guildford, GU2 7XH, UK

**Preprint location: MedRxiv**

CF, KL and MS contributed equally to this paper.

Keywords: Saliva, Metabolomics, COVID-19, Prognostic Test, Liquid Chromatography Mass Spectrometry

NOTE: This preprint reports new research that has not been certified by peer review and should not be used to guide clinical practice.

## 23 **Abbreviations**

|                          |                                                 |
|--------------------------|-------------------------------------------------|
| COVID-19                 | Coronavirus disease 19                          |
| CRP                      | C-reactive protein                              |
| HTN                      | Hypertension                                    |
| IHD                      | Ischemic heart disease                          |
| KEGG                     | Kyoto Encyclopedia of Genes and Genomes         |
| LC                       | Liquid chromatography                           |
| LC-MS                    | Liquid chromatography mass spectrometry         |
| LOOCV                    | Leave-one-out cross validation                  |
| MS                       | Mass spectrometry                               |
| MS/MS or MS <sup>2</sup> | Tandem mass spectrometry                        |
| NPA                      | Negative percent agreement                      |
| PCA                      | Principal components analysis                   |
| PCR                      | Polymerase chain reaction                       |
| PLS-DA                   | Partial least squares-discriminant analysis     |
| PPA                      | Positive percent agreement                      |
| QC                       | Quality control                                 |
| RT-PCR                   | Reverse transcription polymerase chain reaction |
| SARS-CoV-2               | Severe acute respiratory syndrome coronavirus 2 |
| T2DM                     | Type 2 diabetes mellitus                        |
| VIP                      | Variable importance in projection               |

24

## 25 **ABSTRACT**

### 26 **Background**

27 The COVID-19 pandemic is likely to represent an ongoing global health issue given  
28 the potential for vaccine escape and the low likelihood of eliminating all reservoirs of  
29 the disease. Whilst diagnostic testing has progressed at pace, there is an unmet  
30 clinical need to develop tests that are prognostic, to triage the high volumes of patients  
31 arriving in hospital settings. Recent research has shown that serum metabolomics has  
32 potential for prognosis of disease progression. <sup>1</sup> In a hospital setting, collection of  
33 saliva samples is more convenient for both staff and patients, and therefore offers an  
34 alternative sampling matrix to serum. We demonstrate here for the first time that saliva  
35 metabolomics can reveal COVID-19 severity.

### 36 **Methods**

37 88 saliva samples were collected from hospitalised patients with clinical suspicion of  
38 COVID-19, alongside clinical metadata. COVID-19 diagnosis was confirmed using RT-  
39 PCR testing. COVID severity was classified using clinical descriptors first proposed by  
40 SR Knight et al. Metabolites were extracted from saliva samples and analysed using  
41 liquid chromatography mass spectrometry.

### 42 **Results**

43 In this work, positive percent agreement of 1.00 between a PLS-DA metabolomics  
44 model and the clinical diagnosis of COVID severity was achieved. The negative  
45 percent agreement with the clinical severity diagnosis was also 1.00, for overall  
46 percent agreement of 1.00.

### 47 **Conclusions**

48 This research demonstrates that liquid chromatography-mass spectrometry can  
49 identify salivary biomarkers capable of separating high severity COVID-19 patients  
50 from low severity COVID-19 patients in a small cohort study.

51

## 52 **1. Introduction**

53 The SARS-CoV-2 pandemic has caused a sustained threat to global health since the  
54 discovery of the virus in 2019.<sup>2</sup> Whilst great strides have been made in both treatment  
55 and vaccination development,<sup>3,4</sup> the disease has inflicted multiple waves of infection  
56 throughout the world during 2020 and into 2021.<sup>5,6</sup> COVID-19 has higher fatality rates  
57 than seasonal influenza,<sup>7</sup> and in addition, new variants are constantly evolving with  
58 the potential for either reduced vaccine effectiveness or altered lethality.<sup>8</sup> As a  
59 consequence, there is a continuing need both for better understanding of the impact  
60 of COVID-19 on the host metabolism as well as for prognostic tests that can be used  
61 to triage the high volumes of patients arriving in hospital settings.

62 Nasopharyngeal swabs followed by polymerase chain reaction (PCR) have been  
63 adopted worldwide for SARS-CoV-2 detection. However, supply chains for swabs  
64 rapidly collapsed amongst exponential increases in demand for testing, highlighting  
65 the urgency for alternative sample types and testing approaches. Furthermore, whilst  
66 PCR tests are easily deployable and highly selective for the virus, these approaches  
67 yield no prognostic information and cannot easily be delivered for rapid turnaround at  
68 the point of care, for example during a hospital admissions process. In contrast, tests  
69 based on mass spectrometry can be provided in minutes, with mass spectrometry  
70 instrumentation typically available in hospital pathology laboratories. Prognostic tests,  
71 whilst challenging due to the varied phenotypes that may present themselves,<sup>9</sup> could  
72 be used to manage demand for hospitalisation and treatment, especially should  
73 vaccine escape lead to future waves of COVID-19 infection.

74 Metabolic biomarkers in serum have been identified that carry prognostic information,  
75 <sup>10,11</sup> but sampling blood is invasive. Our experience in collecting and analysing patient

76 samples is that saliva samples are significantly easier to collect and handle than blood.  
77 Blood collection requires trained phlebotomists, causes discomfort to patients and  
78 must be spun soon after collection to preserve the metabolome. In contrast, a saliva  
79 sample can be donated quickly and painlessly by a patient. Saliva is itself a carrier of  
80 the coronavirus, <sup>12</sup> and has been proposed as a gold standard for SARS-CoV-2  
81 detection. <sup>13,14</sup> It additionally offers information via its own characteristic metabolites.  
82 <sup>15</sup> To date, saliva as a biofluid for metabolism analysis has been used for breast,  
83 pancreatic and also oral cancers. <sup>16,17</sup> Here we explore the potential of saliva  
84 metabolomics to distinguish between severe and mild COVID-19 infection, with a view  
85 to providing a prognostic test that can be used to triage hospital patients, for example  
86 to identify patients who would benefit from immunomodulating drugs such as  
87 Tocilizumab. <sup>18</sup>

88 This work took place as part of the wider efforts of the COVID-19 International Mass  
89 Spectrometry (MS) Coalition. <sup>19,20</sup> This consortium aims to provide molecular level  
90 information on SARS-CoV-2 in infected humans, in order to better understand,  
91 diagnose and treat cases of COVID-19 infection. Data related to this work will be  
92 stored and fully accessible on the MS Coalition open repository. The website URL is  
93 <https://covid19-msc.org/>

## 94 **2. Materials and Methods**

### 95 **2.1 Participant recruitment and ethics**

96 Ethical approval for this project (IRAS project ID 155921) was obtained via the NHS  
97 Health Research Authority (REC reference: 14/LO/1221). 88 participants were  
98 recruited at NHS Frimley NHS Foundation Trust hospitals by researchers from the  
99 University of Surrey. Participants were identified by clinical staff to ensure that they

100 had the capacity to consent to the study, and were asked to sign an Informed Consent  
101 Form; those that did not have this capacity or who did not sign the form were not  
102 sampled. Consenting participants were categorised by the hospital as either “query  
103 COVID” (meaning there was clinical suspicion of COVID-19 infection) or “COVID  
104 positive” (meaning that a positive COVID test result had been recorded during their  
105 admission). All participants were provided with a Patient Information Sheet explaining  
106 the goals of the study.

107 Inclusion for participants was determined by reverse transcription polymerase chain  
108 reaction (RT-PCR) results; participants with an inconclusive RT-PCR test (clinically  
109 positive only and/or inconclusive test result, n=6) or where the time lag between initial  
110 RT-PCR test and sampling exceeded fourteen days were excluded (n=7). These  
111 additional exclusion criteria reduced the participant population from 88 to 75.

## 112 **2.2 Sample collection, extraction and instrumental analysis**

113 Patients were sampled immediately upon recruitment to the study in two waves, one  
114 between May and August 2020 and the second between October and November 2020.  
115 The range in time between symptom onset and saliva sampling ranged from 1 day to  
116 > 1 month, an inevitable consequence of collecting samples in a pandemic situation.  
117 Each participant provided a sample of saliva by spitting directly into a falcon tube which  
118 was placed on ice immediately after collection. Samples were transferred on ice from  
119 the hospital to the University of Surrey by courier within 4 hours of collection, to  
120 minimise changes to salivary metabolites. <sup>21</sup> Once received at University of Surrey,  
121 the samples were stored at minus 80 °C until analysis.

122 Alongside saliva collection, metadata for all participants was also collected covering  
123 *inter alia* sex, age, comorbidities (based on whether the participant was receiving

124 treatment), the results and dates of COVID PCR tests, bilateral chest X-Ray changes,  
125 smoking status, drug regimen, and whether and when the participant presented with  
126 clinical symptoms of COVID-19. Values for lymphocytes, CRP and eosinophils were  
127 also taken; values obtained within five days of the saliva sampling were recorded.  
128 Each participant was attributed a “severity score” in relation to their fitness  
129 observations at the time of hospital admission using the metadata collected. This score  
130 used the “mortality scoring” approach of SR Knight *et al.*<sup>8</sup> adapted to disregard age,  
131 sex at birth and comorbidities, and ranged from 0 to 6; patients scoring 0 to 3 were  
132 attributed low severity and patients scoring 4 to 6 were attributed high severity.

133 Sample preparation and processing followed the guidelines set out by the COVID-19  
134 Mass Spectrometry Coalition.<sup>22</sup> Saliva samples were separated into aliquots: 50 µL  
135 of saliva was added to 200 µL of ice-cold isopropanol to precipitate protein, and this  
136 also had the advantage of deactivating the virus to allow transfer into a lower biological  
137 safety level laboratory. The samples were agitated for one hour, sonicated three times  
138 for 30 seconds, with resting on ice for 30 seconds between each sonication. Each  
139 sample was then left to stand on ice for 30 minutes then centrifuged for 10 minutes at  
140 10 000 g. The supernatant was removed and the precipitated protein pellet reserved  
141 for future analysis. The supernatant then underwent centrifugal filtration (0.22 µm  
142 cellulose acetate) for five minutes at 10,000 g, and the filtered supernatant was then  
143 dried under nitrogen and stored at minus 80 °C.

144 Samples were reconstituted on the day of analysis in 100 µL water:methanol (95:5)  
145 with 0.1% formic acid by volume. 10 µL of each sample was set aside for combination  
146 into a pooled QC. The samples were analysed over a period of eleven days. Each day  
147 consisted of a run incorporating blank injections (n=2), field blank injections (n=3),  
148 pooled QC injections (n=6, 3 at the start and finish), as well as QCs to measure



149 instrumental and extraction variation (n=7 and 3 respectively), and 10 participant  
150 samples, randomised for positive/negative, with 3 repeat analyses for each.

### 151 **2.3 Materials and chemicals**

152 The materials and solvents utilised in this study were as follows: 2 mL microcentrifuge  
153 tubes (Eppendorf, UK), 0.22  $\mu\text{m}$  cellulose acetate sterile Spin-X centrifuge tube filters  
154 (Corning incorporated, USA), 200  $\mu\text{L}$  micropipette tips (Starlab, UK) and Qsert™ clear  
155 glass insert LC vials (Supelco, UK). LC-MS grade 2-propanol was used as an  
156 inactivation solvent. Optima™ LC-MS grade methanol and water were used as  
157 reconstitution solvents and mobile phases. LC-MS grade formic acid was added to the  
158 mobile phase solvents at 0.1% (v/v). Solvents were purchased from Fisher Scientific,  
159 UK.

### 160 **2.4 Instrumentation and operating conditions**

161 Analysis of samples was carried out using a UltiMate 3000 UHPLC equipped with a  
162 binary solvent manager, column compartment and autosampler, coupled to a Q  
163 Exactive™ Plus Hybrid Quadrupole-Orbitrap™ mass spectrometer (Thermo Fisher  
164 Scientific, UK) at the University of Surrey's Ion Beam Centre. Chromatographic  
165 separation was performed on a Waters ACQUITY UPLC BEH C18 column (1.7  $\mu\text{m}$ ,  
166 2.1 mm x 100 mm) operated at 55 °C with a flow rate of 0.3 ml min<sup>-1</sup>.

167 Mobile phase A was water: methanol (v/v 95:5) with 0.1% formic acid, whilst mobile  
168 phase B was methanol:water (v/v, 95:5) with 0.1% formic acid (v/v). An injection  
169 volume of 5  $\mu\text{L}$  was used. The initial solvent mixture was 2% B for one minute,  
170 increasing to 98% B over 16 minutes and held at this level for four minutes. The  
171 gradient was finally reduced back to 2% B and held for two minutes to allow for column  
172 equilibration. Analysis on the Q-Exactive Plus mass spectrometer was performed with

173 a scan range of  $m/z$  100 to 1 000, and 5 ppm mass accuracy. MS/MS validation of  
174 features was carried out on Pooled QC samples using data dependent acquisition  
175 mode and normalised collision energies of 30 and 35 (arbitrary units). Operating  
176 conditions are summarised in Table S1 (Supplementary Material).

## 177 **2.5 Data processing**

178 LC-MS outputs (.raw files) were pre-processed for alignment and peak identification  
179 using Compound Discoverer version 3.1 and Freestyle 1.6 (Thermo Fisher Scientific,  
180 UK). Peak picking was set to a mass tolerance  $\pm 5$  ppm, and alignment to a retention  
181 time window of 120 seconds. Missing values were imputed using a K-nearest  
182 neighbour approach.<sup>23</sup> Features identified by mass spectrometry were initially  
183 annotated using accurate mass match with reference to external databases (KEGG,  
184 Human Metabolome Database, DrugBank, LipidMaps and BioCyc), and then  
185 validation was performed using data dependent MS/MS analysis. This process yielded  
186 an initial peak:area matrix with 10,700 discrete features. Two criteria were used for  
187 inclusion in the final analysis: only those features with identities validated by MS/MS  
188 were used, reducing the number of features to 1,874, and 1,514 features that were  
189 present in less than 30% of participant samples were excluded. This left 360 features  
190 that were used in the analysis. Normalisation was performed using EigenMS in  
191 NOREVA for each dataset analysed,<sup>24,25</sup> i.e. independently for the diagnostic  
192 population (COVID-19 positive versus negative) and prognostic population (COVID-  
193 19 positive: high severity versus low severity).

## 194 **2.6 Statistical Analysis**

195 PCA analyses were conducted in SIMCA (Sartorius Stedim Biotech, France). PLS-DA  
196 and additional machine learning was conducted in R Studio Version 1.3.959 and

197 MetaboAnalyst.<sup>26,27</sup> Leave-one-out cross-validation was used for model validation test  
198 accuracy, sensitivity and specificity; variable importance in projection (VIP) scores  
199 were used to assess feature significance alongside p-values and effect sizes (fold  
200 count). Batch effects were assessed by PCA analysis of both collection batches  
201 (waves one and two) and also instrument and extraction batching by day (Figures S1  
202 and S2, Supplementary Material), showing no clustering by batches. KEGG pathway  
203 analysis was performed using MetaboAnalyst.

204 In prognostic analysis, given the lack of a “gold standard” reference test for whether  
205 COVID-19 is likely to be high severity or low severity (as this depends on clinical  
206 judgement), positive percent agreement (PPA) between the generated model and a  
207 high severity clinical diagnosis was used in preference to sensitivity, which measures  
208 the detection of positive instances of a disease relative to a ground truth value.  
209 Similarly, negative percent agreement (NPA) between the model and a high severity  
210 clinical diagnosis was used in preference to specificity, which measures the absence  
211 of a disease relative to a ground truth value. In diagnostic analysis, given that RT-PCR  
212 tests were available to establish a ground truth, sensitivity and specificity values were  
213 calculated alongside diagnostic accuracy.

### 214 **3. RESULTS**

#### 215 **3.1 Population metadata overview**

216 The study population analysed in this work included 75 participants, comprising 47  
217 participants presenting with a positive COVID-19 RT-PCR test and 28 participants  
218 presenting without. Of the positive participants, 10 were classed as presenting with  
219 high severity COVID-19, 34 were classed as presenting with low severity COVID-19,

220 and 3 lacked sufficient clinical information for severity scoring. A summary of the  
 221 metadata is shown in Table 1.

222 **Table 1:** Summary of clinical characteristics by participant cohort

| Parameters                                              | Covid-19 Low severity | Covid-19 High severity | p-value High vs Low Severity | Covid-19 Negative | p-value Pos vs Neg |
|---------------------------------------------------------|-----------------------|------------------------|------------------------------|-------------------|--------------------|
| n                                                       | 34                    | 10                     |                              | 28                |                    |
| Age (mean, standard deviation; years)                   | 59.7 ± 18.4           | 63.1 ± 12.7            | 0.61                         | 61.6 ± 21.9       | 0.74               |
| Male / Female (n)                                       | 16 / 18               | 8 / 2                  | 0.083                        | 16 / 12           | 0.26               |
| Treated for Hypertension (n)                            | 6                     | 6                      | .041                         | 12                | 0.21               |
| Treated for High Cholesterol (n)                        | 2                     | 0                      | 1.00                         | 6                 | .05                |
| Treated for Type 2 Diabetes Mellitus (n)                | 5                     | 3                      | 0.39                         | 10                | 0.29               |
| Treated for Ischemic Heart Disease (n)                  | 1                     | 2                      | 0.149                        | 7                 | 0.09               |
| Current Smoker (n)                                      | 1                     | 0                      | 1.00                         | 0                 | NA                 |
| Ex-Smoker (n)                                           | 12                    | 5                      | 0.71                         | 8                 | 0.46               |
| Medical Acute Dependency admission (n)                  | 10                    | 6                      | 0.26                         | 4                 | 0.06               |
| Intensive Care Unit admission (n)                       | 0                     | 0                      | N/A                          | 0                 | NA                 |
| Survived Admission (n)                                  | 34                    | 8                      | 0.048                        | 27                | 1.00               |
| Lymphocytes (mean, standard deviation; cells / $\mu$ L) | 0.8 ± 0.5             | 0.9 ± 0.7              | 0.77                         | 1.0 ± 0.5         | 0.302              |
| C-Reactive Protein (mean, standard deviation; mg / L)   | 115.4 ± 84.9          | 170.0 ± 83.4           | 0.075                        | 127.3 ± 104.7     | 0.80               |
| Eosinophils (mean, standard deviation; 100 / $\mu$ L)   | 0.1 ± 0.1             | 0.0 ± 0.0              | 0.018                        | 0.3 ± 0.4         | 0.002              |
| Bilateral Chest X-Ray changes (n)                       | 15                    | 8                      | 0.26                         | 3                 | 0.0009             |
| Continuous Positive Airway Pressure (n)                 | 1                     | 1                      | 0.442                        | 3                 | 0.36               |
| O <sub>2</sub> required (n)                             | 9                     | 4                      | 0.69                         | 8                 | 1.00               |

223  
 224 In this study all participants were recruited in a hospital setting with at least potential  
 225 suspicion of COVID-19 infection; controls were age matched and had similar profiles  
 226 in terms of gender, oxygen requirements and survival rates. Significantly more COVID-  
 227 19 positive patients had bilateral chest X-ray changes (p-value 0.0009) and higher  
 228 levels of eosinophils (p-value 0.002), in agreement with literature observations,<sup>10</sup> but  
 229 not for C-reactive protein (CRP, p-value 0.80). Type 2 diabetes mellitus (T2DM) was  
 230 more prevalent in the COVID-19 negative population than the positive population,  
 231 being observed in 36% of COVID-19 negatives versus 30% of high severity COVID-

232 19 patients and 15% of low severity COVID-19 patients, and a similar observation of  
233 greater comorbidity being seen in the negative population was also true for ischemic  
234 heart disease (IHD) and hypertension (HTN). The greater preponderance of  
235 underlying comorbidities within the negative population represents a confounding  
236 factor.

237 Within the COVID-19 positive cohort, comorbidities were again age matched, but the  
238 high severity grouping had more males (80% male for high severity versus 47% for  
239 low severity) and had a statistically significant difference in proportion presenting with  
240 hypertension (p-value 0.04) and a statistically significant decrease in eosinophil levels  
241 (p-value 0.02). CRP was increased by a 1.5x fold count in high severity participants  
242 versus low (p-value 0.08). There was no statistically significant increase in CRP for  
243 low severity versus COVID-19 negative participants, but this may reflect changes to  
244 the inflammatory response caused by interventions reducing CRP levels in cases of  
245 mild COVID-19.

## 246 **3.2 Overview of features identified by Liquid Chromatography Mass** 247 **Spectrometry (LC-MS)**

248 360 features with MS/MS validation were identified as being present in 30% or more  
249 of participant samples. Of these 360 features, 37 were identified as related to medical  
250 interventions or food and were excluded, leaving 323 for statistical analysis. Of the  
251 323, 38 were annotated by *m/z* value, 171 were annotated by formula (elemental  
252 composition), and 114 were annotated as metabolites.

## 253 **3.3 Analysis of cohorts by multivariate techniques**

254 Initially separation of COVID-19 positive versus negative participants was tested, as  
255 well as separation of COVID-19 high severity and low severity. As shown in Figure 1A,

256 separation for diagnostic purposes showed no clear separation by visual inspection  
 257 and delivered R<sup>2</sup><sub>Y</sub> of 0.78 and Q<sup>2</sup><sub>Y</sub> of 0.18. Leave-one-out cross-validation (LOOCV)  
 258 provided sensitivity of 0.74 (95% confidence interval of 0.60 - 0.86) and specificity of  
 259 0.75 (0.55 - 0.89), which was considered insufficient to justify further investigation. The  
 260 most significantly dysregulated identified metabolites (measured by p-value) between  
 261 positive and negative COVID-19 status are listed in table S2 (Supplementary Material).  
 262 Figure 1B shows separation for COVID-19 high severity participants versus low  
 263 severity participants. The optimal separation was found using 5 components. Using  
 264 leave-one-out cross validation, PPA for COVID-19 high severity was 1.00 (95%  
 265 confidence interval of 0.69 - 1.00) and NPA was 1.00 (0.90 - 1.00), for overall percent  
 266 agreement with the clinical diagnosis of 1.00 (0.92 - 1.00).

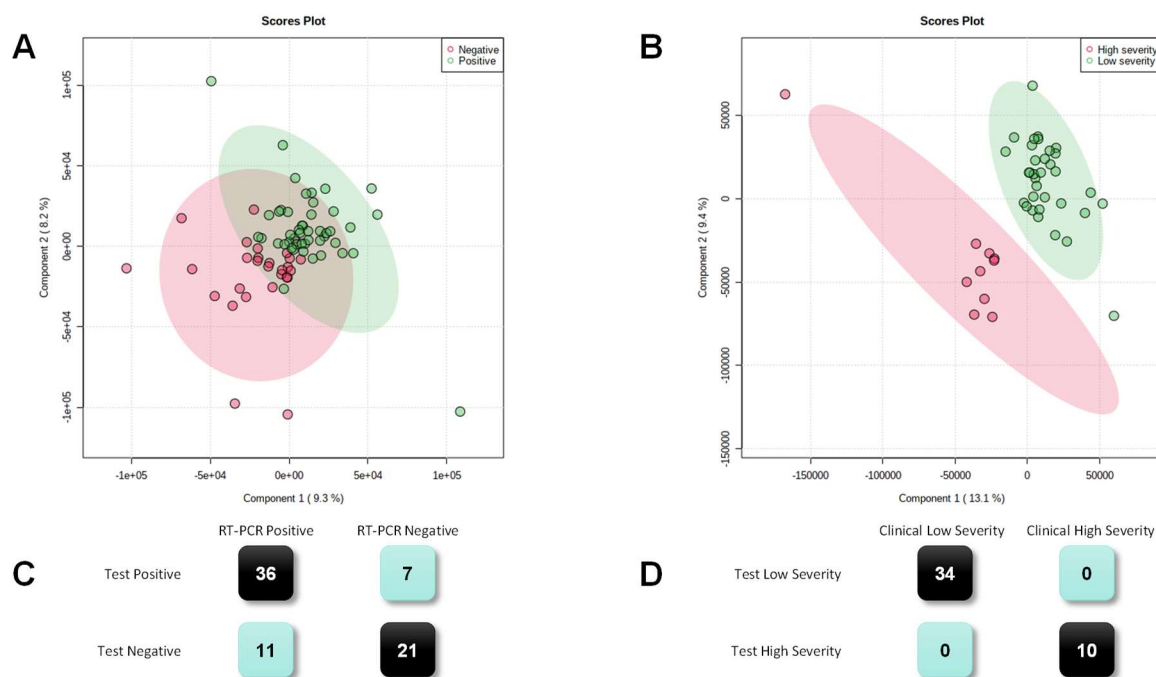

267  
 268 **Figure 1:** Saliva metabolomics analysis for COVID-19 diagnosis and prognosis via  
 269 LC-MS, showing:

270 **A** PLS-DA plot for 75 participants, COVID-19 positive / negative

271 **B** PLS-DA plot for 44 participants, high severity / low severity

272 C LOOCV confusion matrix, COVID-19 positive / negative

273 D LOOCV confusion matrix, high severity / low severity

274

275 A volcano plot is shown in Figure 2. The most significantly dysregulated identified  
276 metabolites (measured by p-value) are shown as boxplots in Figure 3 below and a  
277 complete list of metabolites showing statistically significant differences between high  
278 and low COVID severity populations is shown in table S3 (Supplementary Material).  
279 Amino acids are highlighted as this class of metabolites was the most dysregulated  
280 between high and low severity of the identified features.

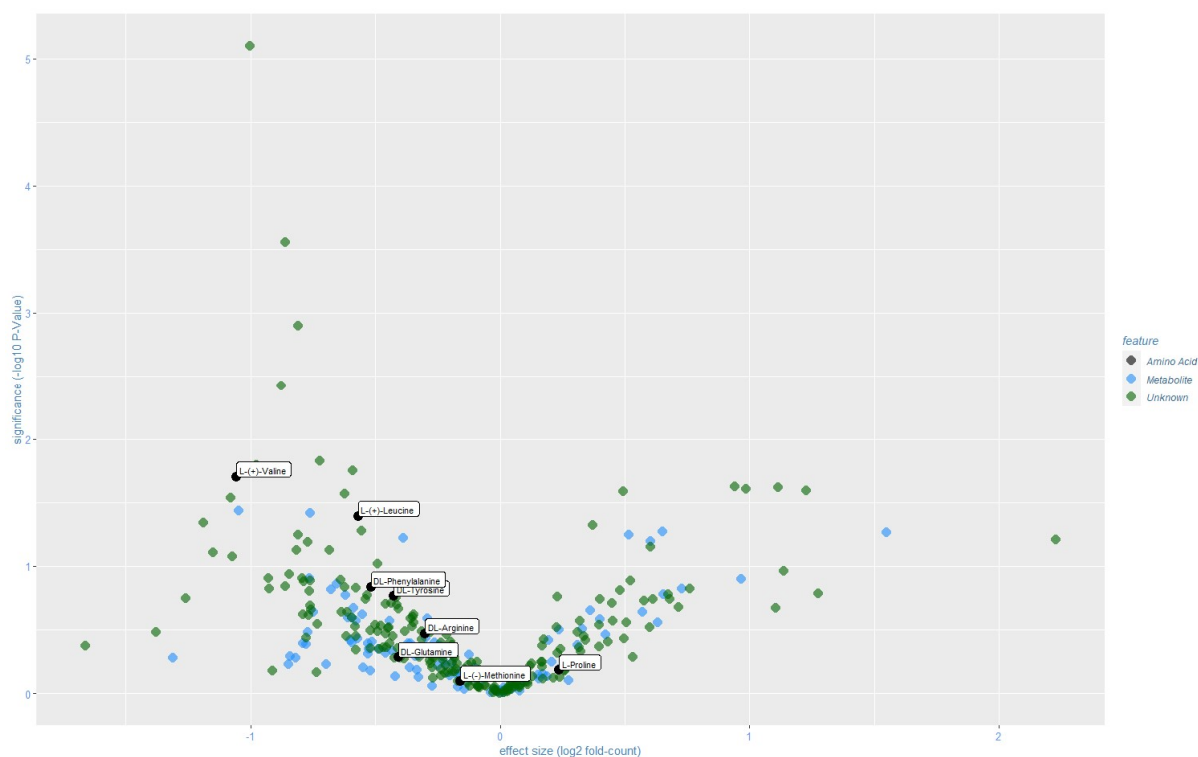

281

282 **Figure 2:** Volcano plot of statistical significance versus effect size for MS/MS validated  
283 features separating participants presenting with high severity versus low severity  
284 COVID-19

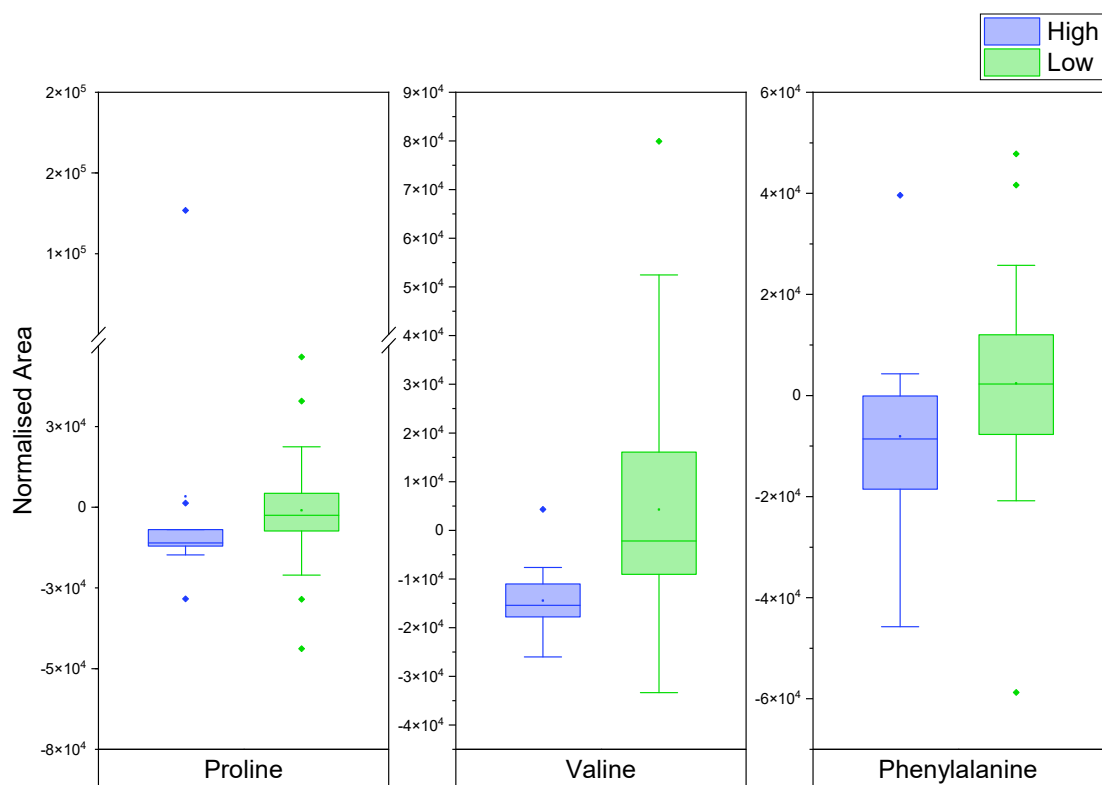

285

286 **Figure 3:** Boxplots of features down regulated with Covid-19 severity

287 [corresponding p-values: 0.066 ; 0.004 ; 0.051]

288

289 MS/MS spectra for the significant features presented in Figure 3 are additionally  
290 shown in Figures S3 to S5 (Supplementary Material).

291 The normalised prognostic dataset was also processed for pathway analysis to  
292 explore changes in metabolic pathways relating to COVID-19 (Figure S6). No  
293 pathways met the criteria for both meaningful impact and statistical significance,  
294 possibly due to the number features identified in each pathway being notably smaller  
295 than typically achieved in serum or plasma, consistent with saliva being a filtrate and  
296 in general featuring lower metabolic concentrations. <sup>28</sup>

### 297 **3.4 Validation set**



398 Whilst no fully independent prognostic validation set was available, it was decided to  
399 project the PLS-DA model obtained for high severity versus low severity participants  
300 on to COVID-19 negative participants. Given that these participants should not show  
301 features associated with high severity COVID-19, this was considered to offer  
302 additional information. The confusion matrix for the results of the projection is shown  
303 in Table 2 below.

304 **Table 2:** Confusion matrix for PLS-DA model projected on to COVID-19 negative  
305 participants

|                                    | COVID-19 negative participants |
|------------------------------------|--------------------------------|
| PLS-DA model result: High Severity | 1                              |
| PLS-DA model result: Low Severity  | 27                             |

306

#### 307 4. Discussion

308 Whilst age and recruitment venue were well matched (all participants were recruited  
309 in a hospital setting including controls), a number of variables within the metadata  
310 illustrate the natural difficulties in experimental design experienced during a pandemic.  
311 Age ranges of participants were large, a wide range of comorbidities were present,  
312 and the time between symptom onset and saliva sampling ranged from 1 day to > 1  
313 month. Participant recruitment of the most severely affected was limited by ethics  
314 approval only covering patients who could give informed consent, thereby precluding  
315 the participation of patients with the highest COVID severity. Furthermore, given the  
316 small  $n$  in this pilot study, precision was necessarily low and confidence intervals wide.  
317 In this study, saliva samples were provided under conditions that could be practically  
318 achieved in a hospital pandemic setting, albeit this meant no scope for abstinence  
319 from food and / or drink before saliva sampling, and no prior rinsing of the mouth,

320 leading to potential confounding factors. Separation of COVID-19 positive COVID-19  
321 versus negative participants was limited, possibly due to COVID-19 negative  
322 participants also being hospitalised and in poor health, perhaps having similar  
323 inflammatory responses to some COVID-19 positive participants. In spite of this,  
324 superior differentiation by multivariate analysis was achieved in relation to COVID-19  
325 severity. PLS-DA showed separation of High Severity COVID-19 positive participants  
326 from Low Severity COVID-19 positive participants, with PPA and NPA of 100% by  
327 LOOCV. Furthermore, whilst not a true independent validation set, projecting the PLS-  
328 DA model on to COVID-19 negative participants, i.e. the controls, showed that the  
329 model classified them with 97% consistency as “low risk”, i.e. that the features  
330 associated with high severity were present neither in low severity nor in COVID-19  
331 negative participants.

332 A number of identified metabolites showed statistically significant differences between  
333 the high and low severity participants. Both valine (p-value 0.02, fold-count 0.48) and  
334 leucine (p-value 0.04, fold-count 0.67) showed statistically significant changes  
335 between high and low severity. As shown in Figure 3, amino acids constituted the  
336 class of metabolites seeing the most change between high and low severity, similar to  
337 literature observations of changes in either amino acids or ratios of amino acids, albeit  
338 specific amino acids commonly cited in the literature (for example kynurenine, arginine  
339 or ratios thereof) <sup>1,29,30</sup> did not feature in the saliva analysis presented here. It should  
340 be noted, however, that the correlation of metabolites between saliva and blood has  
341 previously been found to be weak or in some cases non-existent, <sup>31,32</sup> and the same  
342 may be true for the saliva and blood of individuals testing positive for COVID-19. Direct  
343 analysis of paired blood samples would be required to draw any definitive conclusion  
344 on differential dysregulation of metabolites between serum and saliva.

## 345 **5. Conclusion**

346 In this work a number of features have been identified for the first time that may  
347 differentiate the saliva of those presenting with high severity and low severity COVID-  
348 19. We believe that saliva has potential to add to understanding of the progression  
349 and severity of COVID-19. In addition, saliva may be collected less invasively than  
350 other biofluids, and mass spectrometry techniques have the advantage of being often  
351 located within hospitals, making MS-based techniques useful in a clinical setting.  
352 Consequently, we view saliva as a worthy biofluid for consideration for prognostic  
353 testing.

## 354 **Data sharing statement**

355 Participant metadata data with identifiers, alongside peak:area matrices used in this  
356 work will be made available on the Mass Spectrometry Coalition website upon  
357 publication of this study. The analytical protocols used as well as mass spectrometry  
358 .raw files, sample and participant data will be openly available for all researchers to  
359 access. The website URL is <https://covid19-msc.org/>

## 360 **Declaration of Competing Interest**

361 The authors have no competing interest to declare.

## 362 **Author's contributions**

363 CF and KL collected and extracted all samples used in this work, were responsible for  
364 LC-MS method development, data processing and statistical analysis in SIMCA. MS  
365 conducted machine learning and pathway analyses and additionally drafted the  
366 manuscript. CC and HL supported mass spectrometry method development and  
367 advised on analytical methods. AS and DDW obtained ethical approval and biobanking

368 of samples. GE and DG facilitated access to participants and collected participant  
369 metadata. DS, DT, PB, KH and AP supported experimental and statistical design and  
370 also provided editorial comment on the draft manuscript. MB oversaw all aspects of  
371 this work, including obtaining funding for the study, clinical access, experimental  
372 design, analysis and was responsible for supervision of the research team.

### 373 **Funding**

374 The authors would like to acknowledge funding from the EPSRC Impact Acceleration  
375 Account for sample collection and processing, as well as EPSRC Fellowship Funding  
376 EP/R031118/1, the University of Surrey and BBSRC BB/T002212/1. Mass  
377 Spectrometry was funded under EP/P001440/1.

### 378 **Acknowledgements**

379 The authors acknowledge Samiksha Ghimire from Groningen Medical School for  
380 translation of participant information sheets and consent forms into Nepalese, as well  
381 as Kyle Saunders of the University of Surrey for access to batch controls. The authors  
382 are additionally grateful to Thanuja Weerasinge (Jay), Manjula Meda, Chris Orchard  
383 and Joanne Zamani of Frimley Park NHS Foundation Trust for their help with ethics  
384 approvals and access to hospital patients.

385

386 **Supplementary Material**

387 **Table S1:** Operating conditions of the mass spectrometer used in this research.

| <b>Parameter</b>      | <b>Operating condition</b>         |
|-----------------------|------------------------------------|
| Spray voltage         | 3.5 kV                             |
| Capillary temperature | 275 °C                             |
| S-lens RF level       | 50                                 |
| Sheath gas flow rate  | 40                                 |
| Aux gas flow rate     | 0                                  |
| Scan range            | 100 <i>m/z</i> to 1 000 <i>m/z</i> |
| Resolution            | 70 000                             |
| Polarity              | Positive                           |
| AGC target            | 10 <sup>6</sup>                    |
| Maximum inject time   | 200                                |

  

| <b>MS/MS Parameter</b> | <b>Operating condition</b>                             |
|------------------------|--------------------------------------------------------|
| Mode                   | Full Scan MS / dd-MS <sup>2</sup> with inclusion lists |
| Resolution             | 35 000 at <i>m/z</i> 200                               |
| Loop Count             | 6                                                      |
| Intensity threshold    | 5 * 10 <sup>4</sup>                                    |
| Collision energy       | 30 and 35                                              |
| Dynamic Exclusion      | 5 seconds                                              |

388

389

390

391

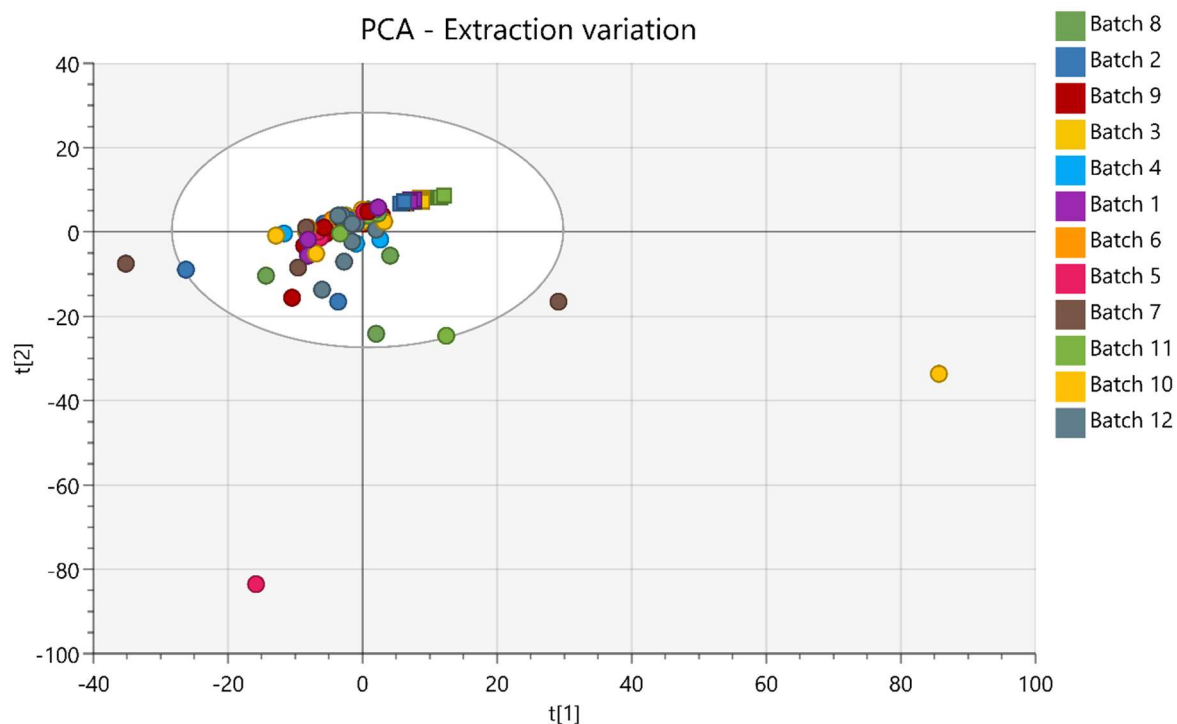

392

393 **Figure S1:** Principal Component Analysis of each patient sample (circles) and batch  
394 QC's (squares), coloured according to extraction batch, showing no significant  
395 clustering of patient samples according to extraction batch (square: QC ; circle:  
396 patients)

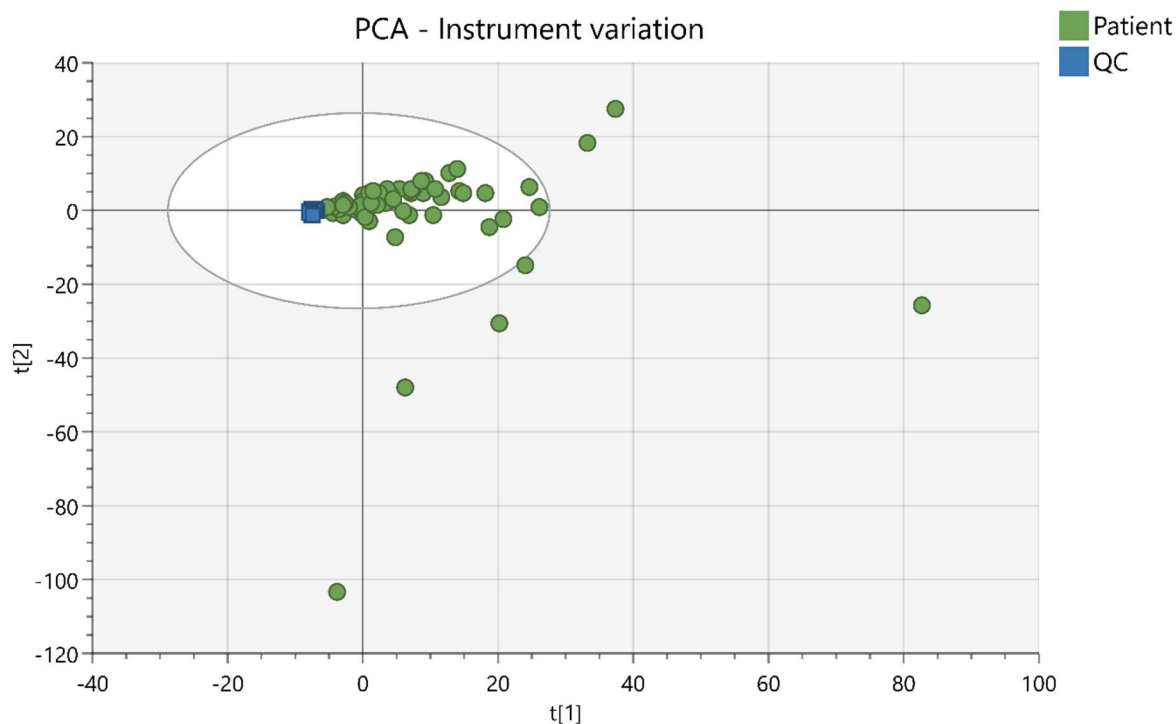

397

398 **Figure S2:** Principal Component Analysis of each patient sample and run QC,  
 399 showing low levels of QC variation according to position in the run sequence

400 **Table S2:** Features distinctive between COVID-19 positive and negative

| Feature                                      | Fold Count | p-value |
|----------------------------------------------|------------|---------|
| C25 H36 N6 O6                                | 0.52       | 0.0121  |
| DL-Phenylalanine                             | 1.39       | 0.0164  |
| C7 H10 N6 O2                                 | 1.35       | 0.0179  |
| 2-linoleoyl-sn-glycero-3-phosphoethanolamine | 1.85       | 0.0180  |
| C39 H71 N2 O16 P3                            | 0.81       | 0.0226  |
| DC2810000                                    | 1.60       | 0.0231  |
| 179.8965                                     | 2.09       | 0.0251  |
| 1-Hexadecanoylpyrrolidine                    | 1.84       | 0.0287  |
| Taurine                                      | 1.44       | 0.0292  |
| 2707                                         | 1.19       | 0.0363  |
| 148.0048                                     | 0.70       | 0.0379  |
| C47 H84 N9 O13 P3                            | 0.73       | 0.0415  |
| C22 H36 N8 O9                                | 1.39       | 0.0439  |

|                |      |        |
|----------------|------|--------|
| 3721           | 1.70 | 0.0443 |
| butyl acrylate | 1.62 | 0.0470 |
| C2 H3 N3 O2 P2 | 1.25 | 0.0501 |

401

402 **Table S3:** Features distinctive between COVID-19 high severity and low severity

| Feature                                        | Fold Count | p-value |
|------------------------------------------------|------------|---------|
| C44 H74 N8 O16                                 | 0.50       | 0.0000  |
| C39 H67 N7 O15                                 | 0.55       | 0.0003  |
| C29 H56 N7 O11 P                               | 0.57       | 0.0013  |
| C42 H72 N8 O17                                 | 0.54       | 0.0038  |
| C49 H81 N9 O17                                 | 0.61       | 0.0148  |
| C37 H67 N6 O12 P3                              | 0.51       | 0.0160  |
| C47 H84 N9 O13 P3                              | 0.66       | 0.0178  |
| Valine                                         | 0.48       | 0.0198  |
| C6 H13 N2 O6 P                                 | 1.92       | 0.0237  |
| C9 H21 N O6                                    | 2.17       | 0.0241  |
| C17 H22 N4 O8                                  | 1.98       | 0.0247  |
| C8 H12 O5 P2                                   | 2.34       | 0.0254  |
| C2 H8 O5 P2                                    | 1.41       | 0.0258  |
| C60 H86 N10 O9 P2                              | 0.65       | 0.0270  |
| C32 H48 N8 O9                                  | 0.47       | 0.0289  |
| Lys-phe                                        | 0.48       | 0.0367  |
| N-{3-[(4-Acetamidobutyl)amino]propyl}acetamide | 0.59       | 0.0382  |
| Leucine                                        | 0.67       | 0.0405  |
| C42 H71 N7 O15                                 | 0.44       | 0.0453  |
| 273.86553                                      | 1.29       | 0.0475  |

403



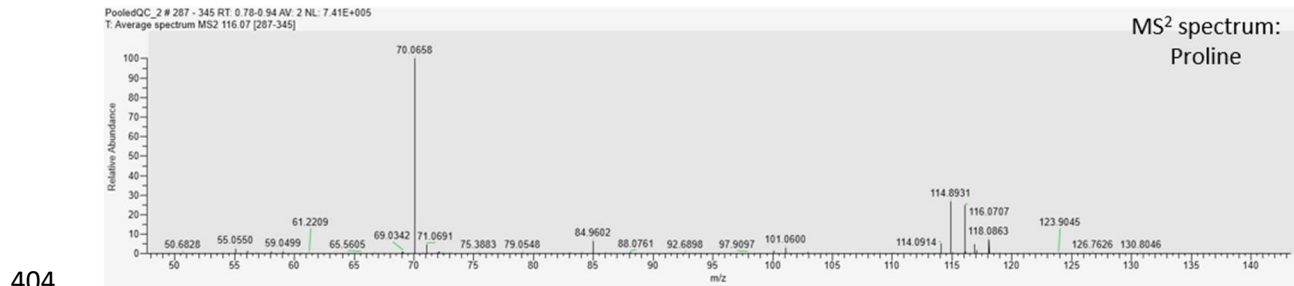

405 **Figure S3:** MS/MS spectra of proline

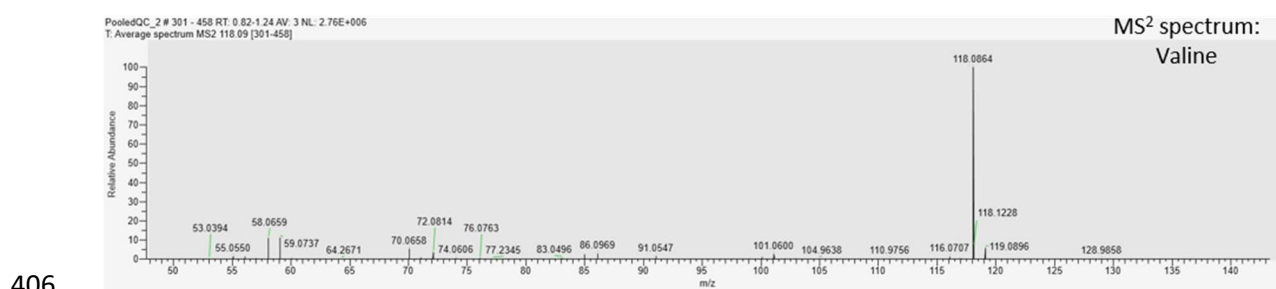

407 **Figure S4:** MS/MS spectra of valine

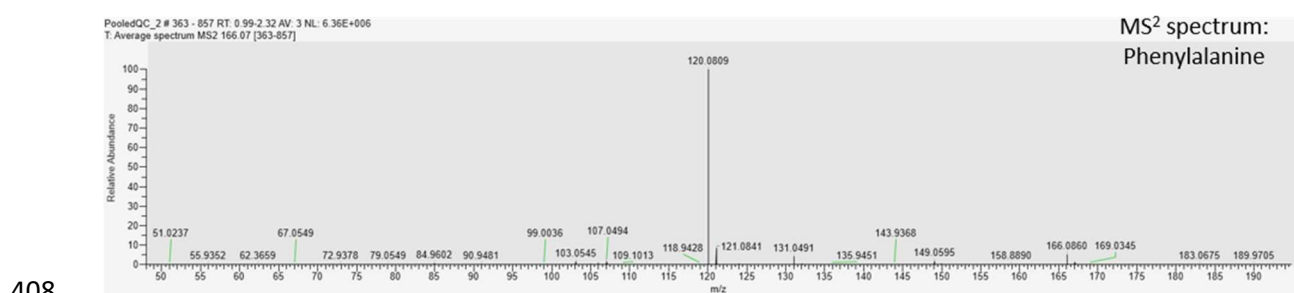

409 **Figure S5:** MS/MS spectra of phenylalanine

410

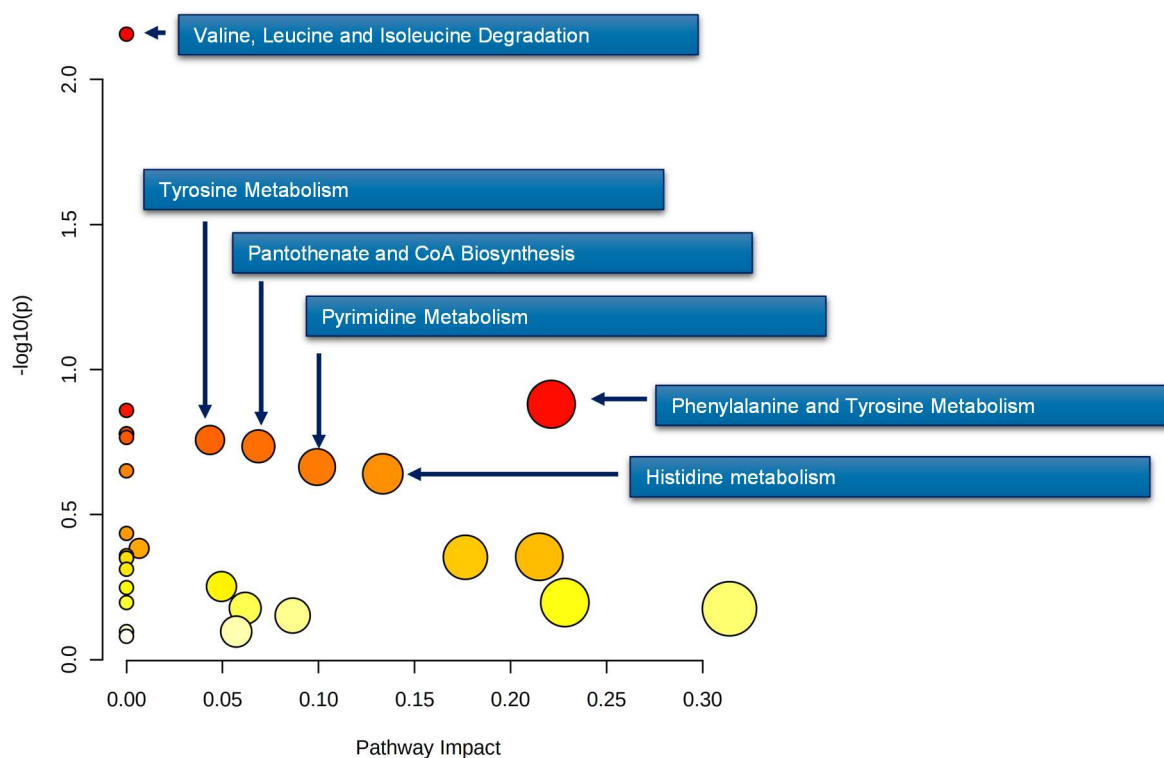

411

412 **Figure S6:** Pathways analysis of metabolites : high severity versus low severity

413

#### 414 **References**

- 415 1 Danlos F-X, Grajeda-Iglesias C, Durand S, *et al.* Metabolomic analyses of  
416 COVID-19 patients unravel stage-dependent and prognostic biomarkers. *Cell*  
417 *Death Dis* 2021; **12**: 258.
- 418 2 WHO. Novel Coronavirus – China. 2020. [https://www.who.int/csr/don/12-](https://www.who.int/csr/don/12-january-2020-novel-coronavirus-china/en/)  
419 [january-2020-novel-coronavirus-china/en/](https://www.who.int/csr/don/12-january-2020-novel-coronavirus-china/en/) (accessed July 27, 2020).
- 420 3 Africa S. Comment Oxford – AstraZeneca COVID-19 vaccine efficacy. 2021;  
421 **397**: 174–6.
- 422 4 The RECOVERY Collaborative Group. Dexamethasone in Hospitalized

- 423 Patients with Covid-19 — Preliminary Report. *N Engl J Med* 2020.
- 424 DOI:10.1056/nejmoa2021436.
- 425 5 Cacciapaglia G. Second wave COVID - 19 pandemics in Europe : a temporal  
426 playbook. *Sci Rep* 2020; : 1–8.
- 427 6 Lai JW, Cheong KH. Superposition of COVID-19 waves , anticipating a  
428 sustained wave , and lessons for the future. 2020; : 1–12.
- 429 7 Piroth L, Cottenet J, Mariet A-S, *et al.* Comparison of the characteristics,  
430 morbidity, and mortality of COVID-19 and seasonal influenza: a nationwide,  
431 population-based retrospective cohort study. *Lancet Respir Med* 2020; **2600**:  
432 1–9.
- 433 8 WHO. SARS-CoV-2 Variant – United Kingdom of Great Britain and Northern  
434 Ireland. 2020. <https://www.who.int/csr/don/21-december-2020-sars-cov2-variant-united-kingdom/en/> (accessed Jan 25, 2021).
- 435
- 436 9 Darmon M, Dumas G. Anticipating outcomes for patients with COVID-19 and  
437 identifying prognosis patterns. *Lancet Infect Dis* 2021; **21**: 744–5.
- 438 10 Knight SR, Ho A, Pius R, *et al.* Risk stratification of patients admitted to  
439 hospital with covid-19 using the ISARIC WHO Clinical Characterisation  
440 Protocol: development and validation of the 4C Mortality Score. *BMJ* 2020;  
441 **370**: m3339.
- 442 11 Shen B, Yi X, Sun Y, *et al.* Article Proteomic and Metabolomic  
443 Characterization of COVID-19 Patient Sera II Article Proteomic and  
444 Metabolomic Characterization of COVID-19 Patient Sera. 2020; : 59–72.
- 445 12 To KK, Tsang OT, Yip CC, *et al.* Consistent Detection of 2019 Novel

- 446            Coronavirus in Saliva. 2020; **71**: 841–3.
- 447    13    Costa G, Pereira CM, Kelly T, Valente AP. Saliva NMR-Based Metabolomics  
448            in the War Against COVID-19. 2020. DOI:10.1021/acs.analchem.0c04679.
- 449    14    Tan SH, Allicock O, Armstrong-Hough M, Wyllie AL. Saliva as a gold-standard  
450            sample for SARS-CoV-2 detection. *Lancet Respir Med* 2021.  
451            DOI:10.1016/S2213-2600(21)00178-8.
- 452    15    Mandel ID. The Functions of Saliva. *J Dent Res* 1987; **66**: 623–7.
- 453    16    Sugimoto M, Wong DT, Hirayama A, Soga T, Tomita M. Capillary  
454            electrophoresis mass spectrometry-based saliva metabolomics identified oral,  
455            breast and pancreatic cancer-specific profiles. *Metabolomics* 2010; **6**: 78–95.
- 456    17    Assad DX, Acevedo AC, Cançado E, *et al.* Using an Untargeted Metabolomics  
457            Approach to Identify Salivary Metabolites in Women with Breast Cancer. 2020;  
458            : 1–13.
- 459    18    Janik E, Niemcewicz M, Podogrocki M, Saluk-Bijak J, Bijak M. Existing Drugs  
460            Considered as Promising in COVID-19 Therapy. *Int J Mol Sci* 2021; **22**: 5434.
- 461    19    Struwe W, Emmott E, Bailey M, *et al.* The COVID-19 MS Coalition—  
462            accelerating diagnostics, prognostics, and treatment. *Lancet* 2020; **395**: 1761–  
463            2.
- 464    20    Spick M, Longman K, Frampas C, *et al.* Changes to the sebum lipidome upon  
465            COVID-19 infection observed via rapid sampling from the skin.  
466            *EClinicalMedicine* 2021; : 100786.
- 467    21    Duarte D, Castro B, Pereira JL, Marques JF, Lu A, Gil AM. Evaluation of Saliva  
468            Stability for NMR Metabolomics : Collection and Handling Protocols. ; : 1–15.

- 469 22 COVID-19 Mass Spectrometry Coalition. COVID-19 metabolomics and  
470 lipidomics protocol. 2020. [https://covid19-msc.org/metabolomics-and-](https://covid19-msc.org/metabolomics-and-lipidomics-protocol/)  
471 [lipidomics-protocol/](https://covid19-msc.org/metabolomics-and-lipidomics-protocol/) (accessed Jan 25, 2021).
- 472 23 Beretta L, Santaniello A. Nearest neighbor imputation algorithms: A critical  
473 evaluation. *BMC Med Inform Decis Mak* 2016; **16**. DOI:10.1186/s12911-016-  
474 0318-z.
- 475 24 Karpievitch Y V, Taverner T, Adkins JN, *et al*. Normalization of peak intensities  
476 in bottom-up MS-based proteomics using singular value decomposition.  
477 *Bioinformatics* 2009; **25**: 2573–80.
- 478 25 Li B, Tang J, Yang Q, *et al*. NOREVA: Normalization and evaluation of MS-  
479 based metabolomics data. *Nucleic Acids Res* 2017; **45**: W162–70.
- 480 26 R Core Team. R: A Language and Environment for Statistical Computing.  
481 2020. <https://www.r-project.org/>.
- 482 27 Chong J, Wishart DS, Xia J. Using MetaboAnalyst 4.0 for Comprehensive and  
483 Integrative Metabolomics Data Analysis. *Curr Protoc Bioinforma* 2019; **68**: e86.
- 484 28 Rossini EL, Milani MI, Lima LS, Pezza HR. Paper microfluidic device using  
485 carbon dots to detect glucose and lactate in saliva samples. *Spectrochim Acta*  
486 *Part A Mol Biomol Spectrosc* 2021; **248**: 119285.
- 487 29 Thomas T, Stefanoni D, Reisz JA, *et al*. COVID-19 infection alters kynurenine  
488 and fatty acid metabolism, correlating with IL-6 levels and renal status. *JCI*  
489 *Insight* 2020; **5**. DOI:10.1172/jci.insight.140327.
- 490 30 Fraser DD, Slessarev M, Martin CM, *et al*. Metabolomics Profiling of Critically  
491 Ill Coronavirus Disease 2019 Patients: Identification of Diagnostic and

- 492 Prognostic Biomarkers. *Crit Care Explor* 2020; **2**: e0272.
- 493 31 Do KT, Kastenmüller G, Mook-Kanamori DO, *et al.* Network-Based Approach  
494 for Analyzing Intra- and Interfluid Metabolite Associations in Human Blood,  
495 Urine, and Saliva. *J Proteome Res* 2015; **14**: 1183–94.
- 496 32 Bel'skaya L V, Sarf EA, Kosenok VK. Age and gender characteristics of the  
497 biochemical composition of saliva: Correlations with the composition of blood  
498 plasma. *J Oral Biol Craniofacial Res* 2020; **10**: 59–65.
- 499
